# Supplementary material for: Bacteria Halotolerant from Karst Sinkholes as a Source of Biosurfactants and Bioemulsifiers
Source: MDPI journal article supplement (doi:10.3390/microorganisms10071264), 2022-06-21
Supplement: s1 [file s1]

**Table S2.** Principal component analysis (PCA) correlations of the collapsed droplet and emulsification index under different combinations of C/N source, in sessile (S) and planktonic (P) bacterial culture.

| Strains                                  | Drop collapse (mm) |               | Emulsification index (EI <sub>24</sub> ) |               |
|------------------------------------------|--------------------|---------------|------------------------------------------|---------------|
|                                          | Nitrogen source    | Carbon source | Nitrogen source                          | Carbon source |
| <i>Bacillus siamensis</i> XHA14-P        | -0.313690          | -0.504833     | 0.437903                                 | -0.433013     |
| <i>Bacillus vallismortis</i> XHA16-P     | 0.529656           | -0.146911     | 0.546260                                 | -0.621689     |
| <i>Paenibacillus</i> sp. XHA18-P         | -0.140902          | 0.456522      | 0.821356                                 | 0.334431      |
| <i>Bacillus</i> sp. TZS01-P              | 0.244418           | -0.697329     | 0.306472                                 | -0.625970     |
| <i>Lysinibacillus fusiformis</i> TZA38-P | 0.000936           | -0.787532     | 0.727082                                 | -0.152237     |
| <i>Bacillus siamensis</i> XHA14-S        | 0.584840           | -0.188207     | 0.752091                                 | -0.091984     |
| <i>Bacillus vallismortis</i> XHA16-S     | -0.274070          | -0.699446     | 0.724748                                 | -0.006858     |
| <i>Paenibacillus</i> sp. XHA18-S         | 0.561925           | -0.177646     | 0.660008                                 | 0.570003      |
| <i>Bacillus</i> sp. TZS01-S              | 0.648176           | -0.379049     | 0.437563                                 | -0.443241     |
| <i>Lysinibacillus fusiformis</i> TZA38-S | 0.029721           | 0.266228      | -0.426036                                | 0.563514      |
