# Supplementary material for: Bacteria Halotolerant from Karst Sinkholes as a Source of Biosurfactants and Bioemulsifiers
Source: MDPI journal article supplement (doi:10.3390/microorganisms10071264), 2022-06-21
Supplement: s1 [file s1]

**Table S1.** Biosurfactant (drop collapse  $\geq 4$  mm) and/or bioemulsifier ( $EL_{24} \geq 50\%$ ) activity stable at different salt concentrations, tolerance to NaCl, pH and haemolytic activity of bacteria isolated from the X'can ho che (XH) and Temozón (TZ) sinkholes.

|    | Strain | Specie as close relatives         | Emulsification index $EL_{24}$ (%) |         |          | Drop collapse (mm) |         |          | Tolerance a NaCl (%) | pH   | Haemolytic activity (mm) |
|----|--------|-----------------------------------|------------------------------------|---------|----------|--------------------|---------|----------|----------------------|------|--------------------------|
|    |        |                                   | TSB                                | NaCl 5% | NaCl 10% | TSB                | NaCl 5% | NaCl 10% |                      |      |                          |
| 1  | XHA01  | <i>Pseudomonas aeruginosa</i>     | 3.29                               | 59.91   | 60.07    | 4.44               | 6.00    | 6.00     | 7.5                  | 7.80 | 2.2                      |
| 2  | XHA03  | <i>Burkholderia cepacia</i>       | 52.48                              | 0.00    | 0.00     | 3.00               | 3.00    | 3.00     | 10.0                 | 7.80 | (-)                      |
| 3  | XHA06  | <i>Pseudomonas</i> sp.            | 57.75                              | 35.39   | 12.92    | 3.00               | 3.00    | 3.00     | 0.5                  | 8.40 | (-)                      |
| 4  | XHA10  | Bacillus Gram negative            | 57.57                              | 16.14   | 13.23    | 4.75               | 5.00    | 5.00     | 17.5                 | 8.40 | 2                        |
| 5  | XHA13  | Bacillus Gram negative            | 52.89                              | 14.35   | 11.38    | 4.00               | 3.00    | 3.00     | 7.5                  | 8.00 | (-)                      |
| 6  | XHA14  | <i>Bacillus siamensis</i>         | 39.17                              | 60.84   | 55.96    | 6.71               | 6.19    | 6.13     | 12.5                 | 7.90 | 2                        |
| 7  | XHA15  | Bacillus Gram negative            | 21.95                              | 0.73    | 0.50     | 4.31               | 3.00    | 3.00     | 10.0                 | 8.20 | 1.6                      |
| 8  | XHA16  | <i>Bacillus vallismortis</i>      | 57.73                              | 60.94   | 54.95    | 6.15               | 5.31    | 4.65     | 12.5                 | 7.60 | 1.7                      |
| 9  | XHA18  | <i>Paenibacillus</i> sp.          | 65.15                              | 61.24   | 62.29    | 3.00               | 3.00    | 3.00     | 7.5                  | 7.80 | (-)                      |
| 10 | XHA19  | Bacillus Gram negative            | 2.26                               | 0.00    | 0.00     | 6.69               | 6.52    | 6.30     | 17.5                 | 8.00 | 2                        |
| 11 | XHA22  | Bacillus Gram positive            | 45.45                              | 27.85   | 22.63    | 4.00               | 3.00    | 3.00     | 10.0                 | 8.00 | (-)                      |
| 12 | XHA24  | Bacillus Gram negative            | 35.26                              | 22.78   | 19.86    | 4.36               | 4.00    | 4.00     | 12.5                 | 7.30 | 1.9                      |
| 13 | XHA25  | <i>Stenotrophomonas</i> sp.       | 33.64                              | 0.00    | 0.00     | 4.19               | 3.00    | 3.00     | 10.0                 | 7.60 | 1.7                      |
| 14 | XHA28  | Family Bacillaceae                | 63.11                              | 62.07   | 38.16    | 3.00               | 3.00    | 3.00     | 17.5                 | 8.10 | (-)                      |
| 15 | XHA30  | Coccus Gram positive              | 55.85                              | 9.92    | 6.60     | 3.00               | 4.00    | 3.00     | 15.0                 | 8.60 | 1.1                      |
| 16 | XHA33  | <i>Staphylococcus</i> sp.         | 59.50                              | 58.10   | 41.67    | 3.50               | 4.00    | 4.00     | 17.5                 | 6.70 | 1.5                      |
| 17 | XHA36  | Coccus Gram positive              | 58.30                              | 0.00    | 0.00     | 3.00               | 3.00    | 3.00     | 20.0                 | 8.20 | 1.4                      |
| 18 | XHA38  | <i>Photobacterium</i> sp.         | 50.12                              | 0.00    | 0.00     | 3.00               | 3.00    | 3.00     | 20.0                 | 8.40 | (-)                      |
| 19 | XHA40  | Bacillus Gram positive            | 52.80                              | 0.00    | 0.00     | 3.00               | 3.00    | 3.00     | 5.0                  | 8.20 | (-)                      |
| 20 | XHA42  | <i>Burkholderia cepacia</i>       | 56.18                              | 0.00    | 0.00     | 3.00               | 3.00    | 3.00     | 20.0                 | 7.90 | (-)                      |
| 21 | XHA46  | Bacillus Gram negative            | 19.92                              | 0.00    | 0.00     | 4.00               | 3.00    | 3.00     | 10.0                 | 8.30 | (-)                      |
| 22 | XHA47  | Bacillus Gram negative            | 54.95                              | 0.00    | 0.00     | 3.00               | 3.00    | 3.00     | 5.0                  | 8.00 | (-)                      |
| 23 | XHA52  | Bacillus Gram negative            | 2.90                               | 0.00    | 0.00     | 4.00               | 3.00    | 3.00     | 10.0                 | 8.20 | (-)                      |
| 24 | XHA53  | <i>Staphylococcus epidermidis</i> | 59.66                              | 53.68   | 53.32    | 4.50               | 4.00    | 3.00     | 10.0                 | 8.10 | 1.8                      |
| 25 | XHA58  | Bacillus Gram negative            | 50.56                              | 0.00    | 0.00     | 3.00               | 3.00    | 3.00     | 17.5                 | 8.00 | 1.8                      |
| 26 | XHA60  | Coccus Gram positive              | 54.30                              | 18.85   | 14.42    | 3.00               | 4.63    | 4.63     | 20.0                 | 8.10 | (-)                      |
| 27 | XHA61  | Bacillus Gram -                   | 48.38                              | 0.10    | 0.10     | 4.67               | 4.00    | 3.00     | 10.0                 | 7.90 | 2.1                      |
| 28 | XHA62  | Bacillus Gram positive            | 54.19                              | 0.00    | 0.00     | 4.00               | 4.00    | 3.50     | 10.0                 | 7.90 | 2.2                      |
| 29 | XHA66  | <i>Cytobacillus</i> sp.           | 63.57                              | 62.89   | 61.16    | 3.00               | 3.00    | 3.00     | 10.0                 | 6.10 | (-)                      |
| 30 | XHA69  | Bacillus Gram positive            | 51.56                              | 0.00    | 0.00     | 3.00               | 3.00    | 3.00     | 7.5                  | 8.10 | 2.1                      |
| 31 | XHA70  | Bacillus Gram negative            | 56.11                              | 0.00    | 0.00     | 3.00               | 3.00    | 3.00     | 5.0                  | 8.00 | (-)                      |
| 32 | XHA72  | Bacillus Gram negative            | 51.51                              | 0.00    | 0.00     | 3.00               | 3.00    | 3.00     | 10.0                 | 7.60 | 1.9                      |
| 33 | XHA74  | Diplococci Gram positive          | 55.70                              | 49.73   | 34.03    | 3.00               | 4.38    | 4.44     | 7.5                  | 8.30 | 2                        |
| 34 | XHA76  | Coccus Gram negative              | 54.14                              | 43.19   | 19.55    | 3.00               | 3.00    | 3.00     | 12.5                 | 7.80 | (-)                      |
| 35 | XHA78  | <i>Pseudomonas parafulva</i>      | 59.60                              | 41.27   | 36.89    | 3.00               | 3.00    | 3.00     | 5.0                  | 7.00 | (-)                      |
| 36 | XHA80  | Bacillus Gram negative            | 38.52                              | 0.00    | 0.00     | 3.50               | 3.00    | 3.00     | 10.0                 | 8.10 | (-)                      |
| 37 | XHA84  | Cocobacillus Gram negative        | 12.03                              | 11.71   | 3.26     | 4.13               | 3.00    | 3.00     | 17.5                 | 8.30 | (-)                      |
| 38 | XHA85  | Bacillus Gram positive            | 51.85                              | 0.00    | 0.00     | 3.00               | 3.00    | 3.00     | 10.0                 | 7.60 | (-)                      |
| 39 | XHA88  | Bacillus Gram negative            | 4.84                               | 0.00    | 0.00     | 4.00               | 3.00    | 3.00     | 12.5                 | 8.00 | 2                        |
| 40 | XHA90  | <i>Bacillus</i> sp.               | 63.94                              | 62.22   | 62.04    | 3.00               | 4.00    | 3.00     | 20.0                 | 7.40 | (-)                      |
| 41 | XHA91  | Bacillus Gram negative            | 53.20                              | 0.00    | 0.00     | 3.00               | 3.00    | 3.00     | 5.0                  | 7.90 | (-)                      |
| 42 | XHA96  | Bacillus Gram negative            | 53.97                              | 37.19   | 30.77    | 4.00               | 6.00    | 5.00     | 10.0                 | 7.50 | 2.1                      |
| 43 | XHA98  | Bacillus Gram positive            | 43.92                              | 37.59   | 28.00    | 5.00               | 3.00    | 3.00     | 10.0                 | 7.30 | 1.9                      |
| 44 | XHA99  | Bacillus Gram negative            | 0.24                               | 0.00    | 0.00     | 4.00               | 3.00    | 3.00     | 5.0                  | 7.90 | (-)                      |
| 45 | XHA102 | Bacillus Gram negative            | 46.00                              | 0.00    | 0.00     | 4.00               | 3.00    | 3.00     | 10.0                 | 7.90 | (-)                      |
| 46 | XHA104 | Bacillus Gram negative            | 57.82                              | 0.00    | 0.00     | 3.63               | 3.00    | 3.00     | 0.5                  | 7.70 | 1.9                      |
| 47 | XHA105 | Bacillus Gram negative            | 56.91                              | 56.87   | 34.35    | 3.75               | 3.00    | 3.00     | 2.5                  | 7.80 | (-)                      |
| 48 | XHA109 | Bacillus Gram negative            | 55.30                              | 0.00    | 0.00     | 3.00               | 3.00    | 3.00     | 7.5                  | 7.20 | 1.9                      |
| 49 | TZA01  | <i>Pseudomonas luteola</i>        | 20.41                              | 0.00    | 0.00     | 5.88               | 5.00    | 4.00     | 12.5                 | 7.80 | 1.9                      |
| 50 | TZA02  | Bacillus Gram negative            | 48.77                              | 0.00    | 0.00     | 5.69               | 4.00    | 4.00     | 17.5                 | 7.90 | 1.9                      |
| 51 | TZA03  | <i>Pseudomonas luteola</i>        | 3.44                               | 28.70   | 0.28     | 6.56               | 6.38    | 5.56     | 10.0                 | 7.60 | 1.7                      |
| 52 | TZA04  | <i>Bacillus amyloliquefaciens</i> | 56.11                              | 54.95   | 52.83    | 5.63               | 4.00    | 4.00     | 12.5                 | 7.60 | 1.6                      |
| 53 | TZA05  | <i>Bacillus</i> sp.               | 56.88                              | 51.06   | 48.00    | 6.75               | 6.53    | 6.38     | 12.5                 | 7.80 | 1.8                      |

|    |       |                                           |       |       |       |      |      |      |      |      |     |
|----|-------|-------------------------------------------|-------|-------|-------|------|------|------|------|------|-----|
| 54 | TZA07 | <i>Pseudomonas luteola</i>                | 0.95  | 62.01 | 54.51 | 5.69 | 4.00 | 4.00 | 12.5 | 7.60 | 1.9 |
| 55 | TZA08 | Bacillus Gram -                           | 0.83  | 0.00  | 0.00  | 5.44 | 5.56 | 5.06 | 12.5 | 7.70 | 2   |
| 56 | TZA10 | <i>Pseudomonas</i> sp.                    | 64.38 | 53.79 | 50.95 | 3.00 | 3.00 | 3.00 | 10.0 | 7.90 | 1.7 |
| 57 | TZA11 | <i>Lysinibacillus sphaericus</i>          | 60.29 | 54.53 | 53.79 | 3.00 | 3.00 | 3.00 | 12.5 | 7.70 | (-) |
| 58 | TZA13 | <i>Pseudomonas luteola</i>                | 60.31 | 4.77  | 3.74  | 3.00 | 3.00 | 3.00 | 15.0 | 7.70 | 1.6 |
| 59 | TZA15 | Family Sphingobacteriaceae                | 55.95 | 64.37 | 44.94 | 3.00 | 4.00 | 4.50 | 7.5  | 7.70 | (-) |
| 60 | TZA17 | Bacillus Gram positive                    | 53.36 | 29.72 | 28.80 | 3.00 | 4.75 | 4.75 | 12.5 | 7.60 | 1.5 |
| 61 | TZA18 | Bacillus Gram negative                    | 52.54 | 41.62 | 37.81 | 3.00 | 3.00 | 3.00 | 10.0 | 7.60 | 1.4 |
| 62 | TZA21 | Coccus Gram positive                      | 58.66 | 5.54  | 5.49  | 3.00 | 3.00 | 3.00 | 2.5  | 8.00 | (-) |
| 63 | TZA26 | <i>Staphylococcus epidermidis</i>         | 61.69 | 55.82 | 6.32  | 4.06 | 3.00 | 3.00 | 15.0 | 8.20 | (-) |
| 64 | TZA27 | Coccus Gram negative                      | 56.38 | 0.00  | 0.00  | 3.00 | 3.00 | 3.00 | 5.0  | 7.70 | (-) |
| 65 | TZA32 | Coccus Gram positive                      | 49.69 | 35.39 | 12.92 | 4.56 | 3.00 | 3.00 | 5.0  | 7.90 | 2   |
| 66 | TZA34 | <i>Pseudomonas aeruginosa</i>             | 64.38 | 64.43 | 55.79 | 3.00 | 4.00 | 4.00 | 7.5  | 7.30 | 2.1 |
| 67 | TZA37 | Coccobacillus Gram -                      | 59.49 | 2.63  | 4.09  | 3.00 | 3.00 | 3.00 | 10.0 | 8.20 | (-) |
| 68 | TZA38 | <i>Lysinibacillus fusiformis</i>          | 65.10 | 63.20 | 60.33 | 3.00 | 3.00 | 3.00 | 5.0  | 8.00 | (-) |
| 69 | TZA44 | Coccus Gram negative                      | 54.25 | 0.00  | 0.00  | 4.56 | 4.00 | 4.00 | 7.5  | 8.10 | (-) |
| 70 | TZA45 | Bacillus Gram positive                    | 63.07 | 47.30 | 41.14 | 5.31 | 4.25 | 4.00 | 17.5 | 7.80 | 1.3 |
| 71 | TZA46 | <i>Brevibacillus</i> sp.                  | 65.51 | 63.62 | 57.40 | 3.00 | 3.00 | 3.00 | 2.5  | 8.10 | 1.8 |
| 72 | TZA47 | <i>Brevibacillus</i> sp.                  | 53.02 | 49.87 | 41.35 | 3.78 | 5.00 | 5.25 | 2.5  | 7.30 | (-) |
| 73 | TZA50 | Familia Rhizobiaceae                      | 58.27 | 58.24 | 54.96 | 4.86 | 4.00 | 4.00 | 2.5  | 8.30 | (-) |
| 74 | TZA51 | <i>Lysinibacillus fusiformis</i>          | 61.61 | 61.91 | 58.63 | 3.00 | 3.00 | 3.00 | 5.0  | 9.00 | (-) |
| 75 | TZA53 | <i>Burkholderia cepacia</i>               | 6.44  | 0.00  | 0.00  | 4.25 | 4.00 | 3.00 | 7.5  | 7.70 | 1.7 |
| 76 | TZRP2 | <i>Serratia rubidaea</i>                  | 61.58 | 54.95 | 51.80 | 3.00 | 4.00 | 4.00 | 2.5  | 7.80 | (-) |
| 77 | TZRP3 | <i>Burkholderia cepacia</i>               | 50.95 | 39.42 | 40.05 | 3.00 | 3.00 | 3.00 | 15.0 | 7.90 | 2.1 |
| 78 | TZRP5 | <i>Bacillus cereus</i> var. <i>cereus</i> | 57.92 | 0.00  | 0.00  | 5.14 | 6.00 | 5.00 | 5.0  | 7.50 | (-) |
| 79 | TZS01 | <i>Bacillus</i> sp.                       | 57.80 | 53.36 | 54.26 | 4.63 | 4.00 | 4.00 | 12.5 | 7.60 | 1.2 |
| 80 | TZS02 | Bacillus Gram negative                    | 56.95 | 55.53 | 55.45 | 4.88 | 3.00 | 3.00 | 12.5 | 7.60 | 1.7 |
